# Supplementary material
Source: publisher figshare collection journal article supplement (https://acs.figshare.com/ndownloader/files/13167938)
Supplement: Supplementary file 1 [file 13167938]

## **Supporting Information**

### **Tuning the pH Response of Weak Polyelectrolyte Brushes with Specific Anion Effects**

Jian Zhang, Hongtao Cai, Ling Tang, Guangming Liu\*

*Hefei National Laboratory for Physical Sciences at the Microscale, Department of Chemical Physics,  
University of Science and Technology of China, Hefei, P. R. China 230026.*

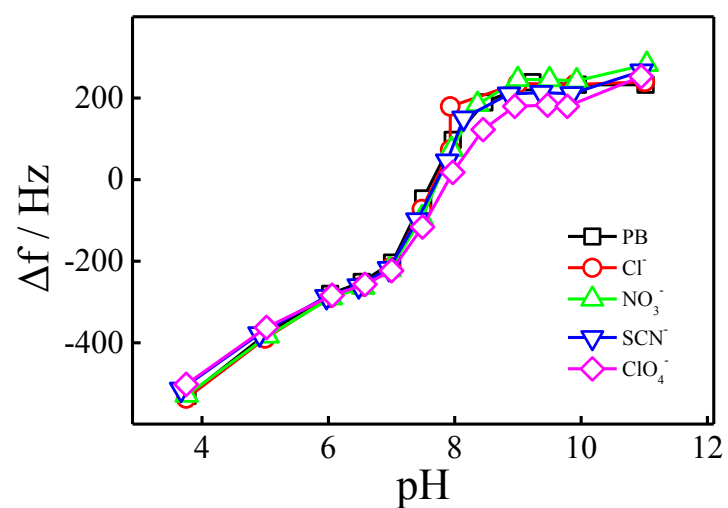

**Figure S1.** Shift in frequency ( $\Delta f$ ) of PDMAEMA brushes as a function of pH in the PB solution and in the presence of different types of anions.

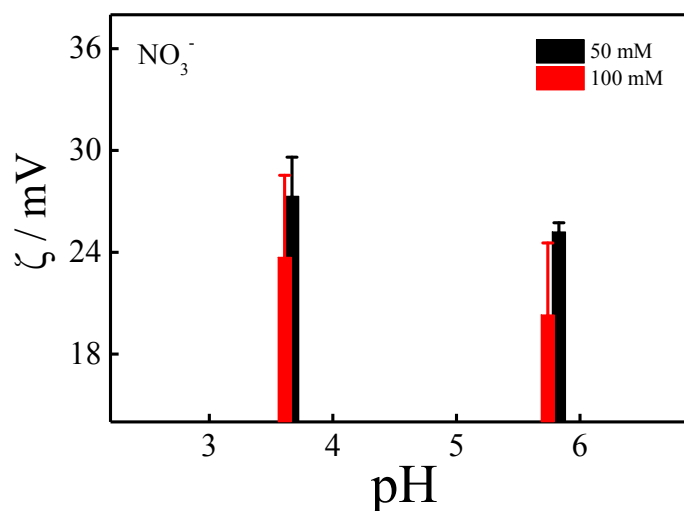

**Figure S2.** pH dependence of the surface zeta potential ( $\zeta$ ) of PDMAEMA brushes in the presence of  $\text{NO}_3^-$  at the salt concentrations of 50 and 100 mM.

Here, the surface zeta potential of PDMAEMA brushes in the presence of  $\text{Cl}^-$  and  $\text{SCN}^-$  cannot be measured due to the occurrence of electrochemical reaction at the salt concentrations of 50 and 100 mM.<sup>S1,S2</sup> The surface zeta potential of PDMAEMA brushes in the presence of  $\text{ClO}_4^-$  also cannot be measured at the salt concentrations of 50 and 100 mM due to the strong interactions between the  $\text{ClO}_4^-$  anions and the positively charged quaternary ammonium groups grafted on the surface of tracer particles.<sup>S3</sup>

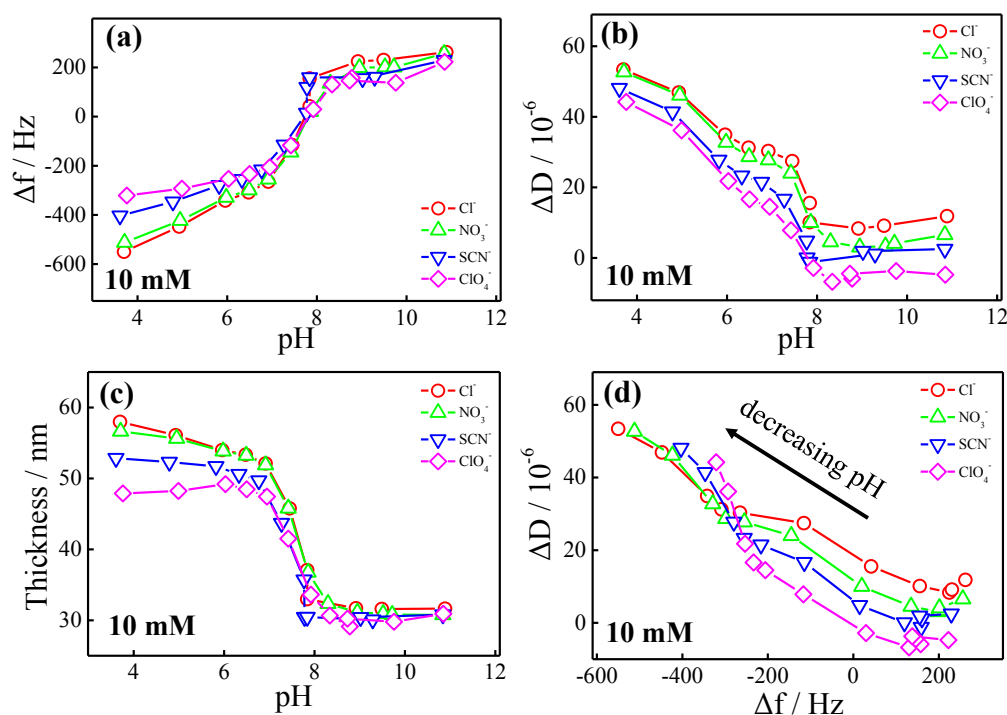

**Figure S3.** (a) pH dependence of the frequency shift ( $\Delta f$ ) of PDMAEMA brushes as a function of anion identity at the salt concentration of 10 mM. (b) pH dependence of the dissipation shift ( $\Delta D$ ) of PDMAEMA brushes as a function of anion identity at the salt concentration of 10 mM. (c) pH dependence of the wet thickness of PDMAEMA brushes as a function of anion identity at the salt concentration of 10 mM. (d) Dissipation shift ( $\Delta D$ ) versus frequency shift ( $\Delta f$ ) of the PDMAEMA brushes as a function of anion identity at the salt concentration of 10 mM during the change in pH.

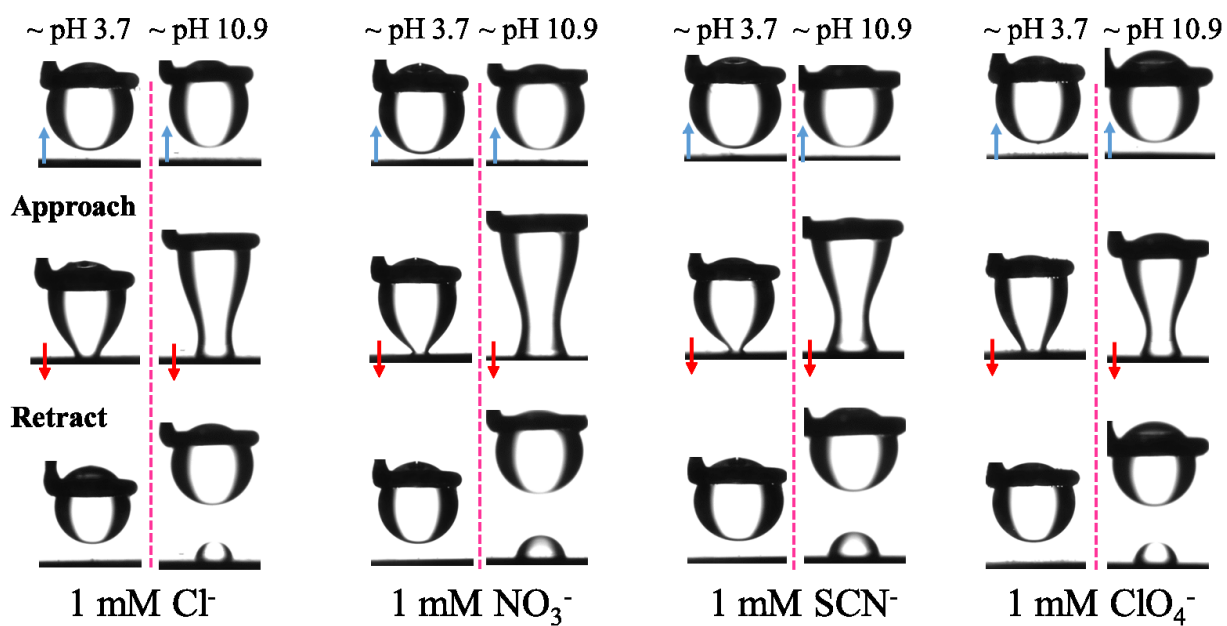

**Figure S4.** A series of photos taken of the PDMAEMA brushes approaching and retracting from an oil (n-hexadecane) droplet at pH of  $\sim 3.7$  and  $\sim 10.9$  for the different types of anions at a salt concentration of 1 mM during measurements of the adhesive force.

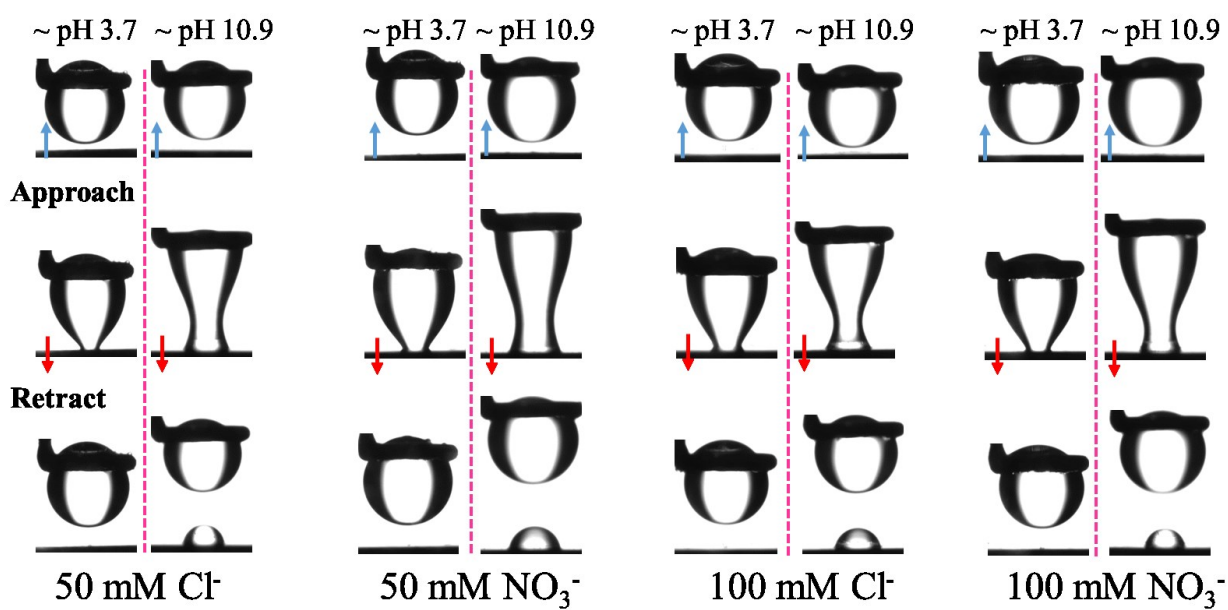

**Figure S5.** A series of photos taken of the PDMAEMA brushes approaching and retracting from an oil (n-hexadecane) droplet at pH of  $\sim 3.7$  and  $\sim 10.9$  for Cl<sup>-</sup> and NO<sub>3</sub><sup>-</sup> at the salt concentrations of 50 and 100 mM during measurements of the adhesive force.

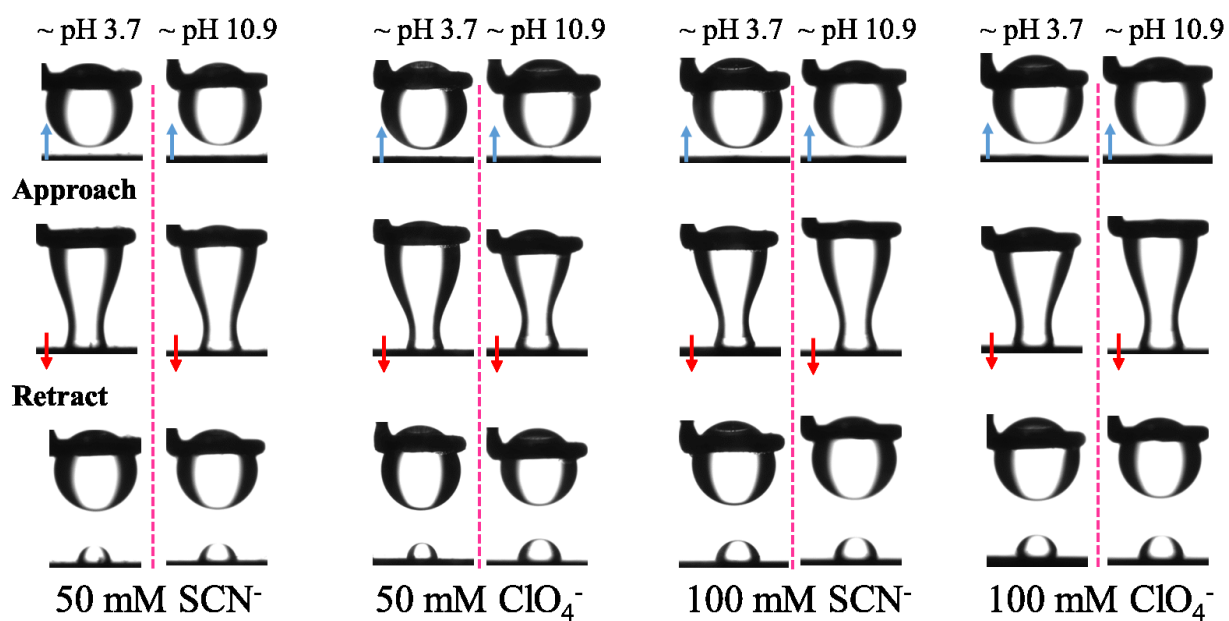

**Figure S6.** A series of photos taken of the PDMAEMA brushes approaching and retracting from an oil (n-hexadecane) droplet at pH of  $\sim 3.7$  and  $\sim 10.9$  for SCN<sup>-</sup> and ClO<sub>4</sub><sup>-</sup> at the salt concentrations of 50 and 100 mM during measurements of the adhesive force.

## References

- S1. Krishnan, P. The Effect of Concentration in Electrochemical Oxidation of Thiocyanate on Platinum Electrode. *J. Solid State Electrochem.* **2007**, *11*, 1327-1334.
- S2. Thomas, T. E.; Al Aani, S.; Oatley-Radcliffe, D. L.; Williams, P. M.; Hilal, N. Laser Doppler Electrophoresis and Electro-Osmotic Flow Mapping: A Novel Methodology for the Determination of Membrane Surface Zeta Potential. *J. Membr. Sci.* **2017**, *523*, 524-532.
- S3. Kou, R.; Zhang, J.; Chen, Z.; Liu, G. M. Counterion Specificity of Polyelectrolyte Brushes: Role of the Specific Ion- Pairing Interactions. *ChemPhysChem* **2018**, *19*, 1404-1413.
